# Supplementary material for: Assessing the importance of cultural diffusion in the Bantu spread into southeastern Africa
Source: PLoS One. 2019 May 8;14(5):e0215573. doi: 10.1371/journal.pone.0215573 (PMC6506142; doi:10.1371/journal.pone.0215573)
Supplement: S1 Data — Names, dates, coordinates, spread periods, spread areas, distances to origins and sample types (materials dated). (XLSX) [file pone.0215573.s002.xlsx]

## Sheet: Database
	S1 Data. 70 early Iron Age (Bantu) stes in East and Southeast Africa. Names, dates and coordinates were obtained from T. Russell et al., PLoS One (2014), table S2. We have included information on spread period, spread area and distances to possible origins of the spread.
	Entries in red indicate the 6 dates rejected as belonging to pre-Bantu populations.
	Entries with yellow background indicate possible origins of the spread.
	Site	Latitude	Longitude	Uncal BP	St Dev	Mean Cal BP	Mean Cal BC/AD	Spread period	Spread Area	Dist Mubuga V (km)	Dist Kabacusi (km)	Dist Katuruka (km)	Dist Mucucu II/3 lioness shelter (km)	Dist Kalambo(km)
1	Nakapapula	-12.82	30.62	3280	90	3517.5	-1568.5	Pre-Bantu	Southern	1049.53	1198.8	1270.62	1255.46	476.462
2	Mubuga V	-3.4	30.02	3160	145	3370.79	-1421.79	Early or Pre-Bantu	West Lake Victoria	0	151.838	291.221	214.662	591.822
3	Kwelikwiji	-6.1	37.55	3130	60	3346.35	-1397.35	Pre-Bantu	Eastern	886.712	981.497	823.649	932.583	747.454
4	Kumadzulo	-17.62	25.53	2970	105	3135.96	-1186.96	Pre-Bantu	Southern	1655.22	1786.12	1922.95	1869.71	1180.36
5	Kabacusi	-2.08	29.67	2815	165	2977.57	-1028.57	Early or Pre-Bantu	West Lake Victoria	151.838	0	243.684	110.677	743.612
6	Bambata Cave Series	-20.5	28.41	2850	60	2976.04	-1027.04	Pre-Bantu	Southern	1909.41	2052.77	2149.46	2121.54	1360.09
7	Kalambo Falls	-8.58	31.25	2730	40	2827.44	-878.44	Early or Pre-Bantu	Southern	591.822	743.612	794.907	788.308	0
8	Katuruka	-1.45	31.77	2450	81	2533.69	-584.69	Early spread	West Lake Victoria	291.221	243.684	0	141.45	794.907
9	Ndonde	-16.73	27.4	2370	115	2447.97	-498.97	Pre-Bantu	Southern	1509.59	1647.82	1765.09	1723.88	997.697
10	Mucucu II/3 lioness shelter	-1.53	30.5	2380	270	2425.52	-476.52	Early spread	West Lake Victoria	214.662	110.677	141.45	0	788.308
11	Salumano	-17.2	24.12	2330	65	2372.62	-423.62	Early spread	Southern	1664.05	1787.31	1940.85	1876.88	1230.72
12	Mumbwa	-14.98	27.08	2250	160	2279.08	-330.08	Early spread	Southern	1327.32	1462.29	1590.13	1541.97	843.941
13	Situmpa	-16.25	25.12	2171	38	2199.96	-250.96	Early spread	Southern	1525.95	1652.49	1799.7	1739.64	1081.54
14	Mufulwe	-13.97	29.58	2170	50	2188.5	-239.5	Early spread	Southern	1176.32	1322.14	1412.83	1386.96	626.376
15	Chaminade	-9.95	33.88	2100	80	2098.5	-149.5	Early spread	Southern	843.793	991.057	973.51	1008.05	326.355
16	Shongweni Waterworks Park	-29.87	30.72	2030	45	1992.81	-43.81	Pre-Bantu	Southern	2944.25	3092.09	3162.11	3151.35	2367.98
17	Limbo	-7.47	39.08	2003	50	1959.29	-10.29	Early spread	Eastern	1100.07	1202.34	1050.8	1157.6	870.893
18	M'teteshi 1	-14.28	28.6	1986	38	1938.3	11.7	Early spread	Southern	1219.79	1361.66	1468.56	1433.03	696.46
19	Matola IV	-25.95	32.45	1856	46	1786.62	163.38	Early spread	Southern	2520.82	2670.82	2725.25	2723.39	1935.61
20	Isami Pati mound/ Isamu Pati Mound	-17.07	26.33	1852	100	1783.22	166.78	Early spread	Southern	1572.48	1706.32	1835.96	1787.14	1084.05
21	Kwale Forest	-4.18	39.43	1850	115	1779.18	170.82	Early spread	Eastern	1047.64	1108.45	903.185	1034.5	1027.64
22	Kilwa Kisiwani	-8.95	39.52	1825	110	1749.91	200.09	Early spread	Eastern	1217.74	1330.64	1196.22	1294.94	909.754
23	Mumba	-3.5	35.33	1780	80	1702.51	247.49	Early spread	Eastern	589.479	648.128	456.456	579.522	722.829
24	Mabveni	-20.37	30.47	1770	120	1699.18	250.82	Early spread	Southern	1887.61	2035.61	2108.54	2094.91	1313.66
25	Ganga GpJa 17	0.33	34.25	1760	160	1688.13	261.87	Early spread	Eastern	626.913	575.39	339.422	465.418	1045.01
26	Kwamboo	-1	37.25	1746	88	1669.48	280.52	Early spread	Eastern	846.456	851.056	611.259	752.691	1073.2
27	Mwika	-3.27	37.58	1700	330	1663.13	286.87	Early spread	Eastern	839.332	888.485	676.449	809.986	915.644
28	Makwe Shelter	-14.4	31.93	1730	110	1653.32	296.68	Early spread	Southern	1240.95	1392.22	1440.08	1439.68	651.379
29	Bombo Kaburi	-4.27	38	1730	115	1638.99	311.01	Early spread	Eastern	890.606	956.297	759.557	886.794	886.394
30	Silver Leaves	-23.92	30.14	1692	24	1599.01	350.99	Early spread	Southern	2281.76	2429.02	2504.71	2489.96	1709.81
31	Phopo Hill	-11.12	33.65	1676	83	1583.67	366.33	Later spread	Southern	947.079	1096.94	1095.1	1121.62	385.864
32	Chobi	2.25	32.2	1660	130	1574.65	375.35	Later spread	Eastern	673.355	557.604	414.189	460.852	1208.84
33	Ziwa Farm	-18.2	32.67	1650	100	1559.24	390.76	Early spread	Southern	1670.79	1822.08	1865.1	1868.68	1080.64
34	Kithiru GpJp 35	0.42	37.77	1625	155	1557.72	392.28	Early spread	Eastern	960.353	942.444	698.768	836.887	1234.25
35	Mtuzi Hill Rockshelter (DZ126)	-14.27	34.18	1646	41	1541.82	408.18	Later spread	Southern	1291.97	1443.16	1449.92	1473.22	708.657
36	Kangonga	-13.07	28.67	1610	115	1525.74	424.26	Later spread	Southern	1085.44	1226.98	1336.41	1298.91	573.253
37	Chowo River Site	-24.21	31.2	1635	28	1520.53	429.47	Early spread	Southern	2317.43	2466.23	2531.54	2523.02	1737.98
38	Kamnama	-13.53	32.85	1600	110	1520.38	429.62	Later spread	Southern	1168.5	1320.34	1348.48	1359.16	577.429
39	Amboni Cave	-5.07	39.05	1590	120	1512.4	437.6	Later spread	Eastern	1018.38	1092.66	902.759	1027.38	945.353
40	Langubhela	-26.28	31.17	1620	50	1506.98	443.02	Early spread	Southern	2547.09	2695.69	2761.72	2753.01	1968.17
41	Enkwazini	-28.18	32.51	1605	38	1483.45	466.55	Early spread	Southern	2768.01	2917.82	2973.28	2971.04	2183.42
42	Klein Afrika	-22.83	29.92	1590	33	1473.05	476.95	Early spread	Southern	2160.54	2307.45	2385.73	2369.28	1590.87
43	Naviundu River	-11.65	27.53	1571	37	1460.65	489.35	Later spread	Southern	957.473	1089.98	1226.85	1172.02	531.33
44	Pwaga	-5.07	30.38	1530	160	1454.17	495.83	Later spread	West Lake Victoria	189.938	341.68	431.081	393.855	401.936
45	Broederstroom, 24/73 K	-25.75	27.83	1520	110	1438.91	511.09	Early spread	Southern	2496.19	2639.34	2734.8	2708.28	1943.16
46	Kapwirimbwe	-15.38	28.37	1505	55	1403.39	546.61	Later spread	Iron metallurgy	1344.31	1485.75	1593.23	1557.67	818.37
47	Manda Island	-2.22	40.97	1430	110	1347.04	602.96	Later spread	Eastern	1223.15	1255.71	1026.04	1166.11	1287.13
48	Kansanshi Hill	-11.67	26.5	1428	62	1340.66	609.34	Later spread	Southern	997.958	1122.18	1276.48	1210.78	623.159
49	Kinsale Farm	-18.6	26.33	1410	95	1324.34	625.66	Later spread	Southern	1737.18	1872.65	1997.13	1951.8	1234.22
50	Diamant	-23.75	28.25	1380	50	1296.75	653.25	Later spread	Southern	2270.79	2414.44	2508.47	2482.61	1716.77
51	Malemba-Nkulu	-8.22	26.78	1318	52	1237.11	712.89	Later spread	Southern	644.701	753.966	933.816	850.322	493.332
52	Naba (Ndaba)	-16.87	29.68	1310	50	1231.42	718.58	Later spread	Southern	1498.26	1644.57	1729.81	1708.09	937.372
53	Bisoli	-21.03	27.57	1304	48	1223.66	726.34	Later spread	Southern	1978.2	2119.4	2224.35	2191.46	1439.53
54	Ntsitsana, Pit 1	-31.07	29.2	1290	50	1212.77	737.23	Later spread	Southern	3077.96	3223.92	3304.68	3287.54	2509.79
55	Mpame	-32.1	29.05	1264	33	1207.07	742.93	Later spread	Southern	3192.9	3338.7	3420.03	3402.62	2625.14
56	Enkapune Ya Muto (GtJil2)	-0.83	36.15	1295	140	1205.13	744.87	Later spread	Eastern	738.624	733.584	491.791	632.918	1018.35
57	Zimbabwe, Fort Victoria	-21.05	31.52	1269	54	1192.89	757.11	Later spread	Southern	1969.29	2118.87	2179.59	2173.34	1386.9
58	Mwanamaimpa	-15.98	26.12	1258	86	1160.72	789.28	Later spread	Southern	1462.42	1593.77	1730.25	1676.93	993.598
59	Chibuene	-22.03	35.32	1229	35	1159.84	790.16	Later spread	Southern	2149.06	2300.9	2320.41	2338.39	1557.63
60	Coronation Park I	-17.83	31.1	1240	100	1148.05	801.95	Later spread	Southern	1608.85	1758.26	1822.84	1813.66	1028.68
61	Malapati	-22.05	31.42	1110	100	1043.07	906.93	Later spread	Southern	2079.28	2228.61	2290.93	2283.89	1497.91
62	Lubusi	-14.37	23.82	1070	60	993.25	956.75	Later spread	Southern	1396.55	1510.08	1681.4	1605.37	1034.12
63	Hola hola	-21.3	34.31	1060	50	981.38	968.62	Later spread	Southern	2043.71	2195.46	2224.32	2236.77	1451.92
64	Massingir	-23.15	32	1030	40	946.97	1003.03	Later spread	Southern	2206.41	2356.3	2413.06	2409.47	1622.08
65	Kamusongolwa Kopje	-13.45	25.85	800	100	754.91	1195.09	Later spread	Southern	1207.74	1332.27	1484.88	1420.78	800.239
66	Mutema's Sacred Grove/Muntema's grove, Melsetter	-19.98	32.55	771	72	721.28	1228.72	Later spread	Southern	1863.92	2014.83	2062.19	2063.62	1275.31
67	Ivuna	-8.43	32.48	646	56	610.43	1339.57	Later spread	Southern	621.939	771.537	780.111	797.943	136.29
68	Broadhurst	-24.53	25.95	590	60	593.49	1356.51	Later spread	Southern	2389.7	2528.09	2641.53	2603.82	1860.64
69	Bigo	0.38	29.9	496	54	537.31	1412.69	Later spread	West Lake Victoria	420.528	274.732	290.923	222.613	1007.47
70	Lanet II, Nakuru	-10.3	36.12	375	100	397.82	1552.18	Later spread	Eastern	1020.6	1158.85	1095.19	1156.1	567.367

## Sheet: Sample_type
Sample type. Material dated in the sites selected as Early Iron Age (Bantu) by T. Russell et al, PLoS One (2014), table S2. Information provided by Thembi Russell (12/12/2018).
*site #44 (Eros) was not included in T. Russell et al., PLoS One (2014), table S2. Thus that database has 107 sites and this one 108 sites.
#	site	sample type
1	Feti la Choya	Charcoal
2	Furi I Mine	wood
3	Kitala II	honey
4	Museque Cave	Charcoal
5	Bisoli	Charcoal
6	Broadhurst	charcoal
7	Taukome (lower levels)	Charcoal
8	Toteng I	Charcoal
9	Mubuga V	Charcoal
10	Campo	Charcoal
11	Mbengue	Charcoal
12	Obobogo	Charcoal
13	D_guesse	Unknown
14	Doulo Igzawa 1	Charcoal
15	Nassarao	Unknown
16	Shum-Laka	Unknown
17	Tazunu Zupaya	Unknown
18	Djambala	Unknown
19	Mpassa farm	Charcoal
20	Tchissanga Ouest	Unknown
21	Ditouba	Charcoal
22	Lac Bleu de Mouila	Charcoal
23	Makokou	Charcoal
24	Mbilap_ 4	Charcoal
25	Moanda II	Charcoal
26	Mont Brazza	Charcoal
27	Oyem 2	Charcoal
28	Rivire Denis	Charcoal
29	Enkapune Ya Muto (GtJil2)	Charcoal
30	Ganga GpJa 17	Charcoal
31	Kithiru GpJp 35	Charcoal
32	Kwale Forest	Charcoal
33	Kwamboo	Unknown
34	Lanet II, Nakuru	Charcoal
35	Manda Island	Charcoal
36	Chaminade	Charcoal
37	Mtuzi Hill Rockshelter (DZ126)	Charcoal
38	Phopo Hill	Charcoal
39	Chibuene	Unknown
40	Hola hola	Unknown
41	Massingir	unknown
42	Matola IV	Unknown
43	Dikundu	Unknown
44	Eros*	Charcoal bearing clayey soil
45	Kapako	charcoal
46	Vungu Vungu	Charcoal
47	Kabacusi	charcoal
48	Mucucu II/3 lioness shelter	charcoal
49	Broederstroom, 24/73 K	Unknown
50	Diamant	Charcoal
51	Enkwazini	Charcoal
52	Klein Afrika	Unknown
53	Mabveni	charcoal
54	Mpame	Unknown
55	Ntsitsana, Pit 1	Unknown
56	Shongweni Waterworks Park	Unknown
57	Silver Leaves	Charcoal
58	Langubhela	Charcoal
59	Amboni Cave	Charcoal
60	Bombo Kaburi	Charcoal
61	Ivuna	Charcoal
62	Katuruka	Unknown
63	Kilwa Kisiwani	Charcoal
64	Kwelikwiji	Charcoal
65	Limbo	Charcoal
66	Mumba	Charcoal
67	Mwika	Unknown
68	Pwaga	Charcoal
69	Bigo	Ash layer
70	Chobi	Unknown
71	Bokele	Charcoal
72	Boma	Charcoal
73	Boso-Njafo	Charcoal
74	Imbonga	Charcoal
75	Malemba-Nkulu	human bone collagen/charcoal
76	Maluba	Charcoal
77	Munda	Charcoal
78	Naviundu River	Charcoal
79	Nsele	Charcoal
80	Ntadi ntadi Cave	Charcoal
81	Pikunda	Charcoal
82	Chowo River Site	Charcoal
83	Isami Pati mound/ Isamu Pati Mound	Charcoal
84	Kalambo Falls	Charcoal
85	Kamnama	Unknown
86	Kamusongolwa Kopje	Unknown
87	Kangonga	Charcoal
88	Kansanshi Hill	Charcoal
89	Kapwirimbwe	Charcoal
90	Kumadzulo	Burnt wood
91	Lubusi	Unknown
92	Makwe Shelter	Charcoal
93	M'teteshi 1	Charcoal
94	Mufulwe	Charcoal
95	Mumbwa	Charcoal
96	Mwanamaimpa	Charcoal
97	Nakapapula	Unknown
98	Ndonde	Charcoal
99	Salumano	Charcoal
100	Situmpa	Charcoal
101	Bambata Cave Series	Charcoal
102	Coronation Park I	Charcoal
103	Kinsale Farm	Charcoal
104	Malapati	Charcoal
105	Mutema's Sacred Grove/Muntema's grove, Melsetter
106	Naba (Ndaba)	Unknown
107	Zimbabwe, Fort Victoria	Wood
108	Ziwa Farm	Unknown
